# Supplementary material for: The high expression of NUDT5 indicates poor prognosis of breast cancer by modulating AKT / Cyclin D signaling
Source: PubMed Central journal article supplement (PMC7877577; doi:10.1371/journal.pone.0245876), 2021-02-11

Figure 3  $\beta$ -actin

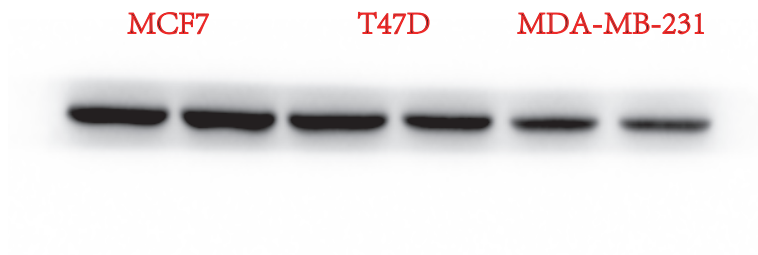

Figure 3 NUDT5

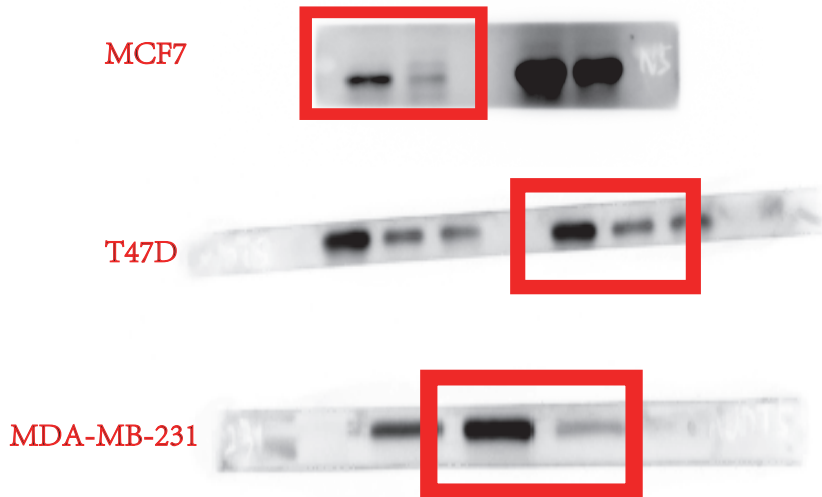

Figure 5  $\beta$ -actin

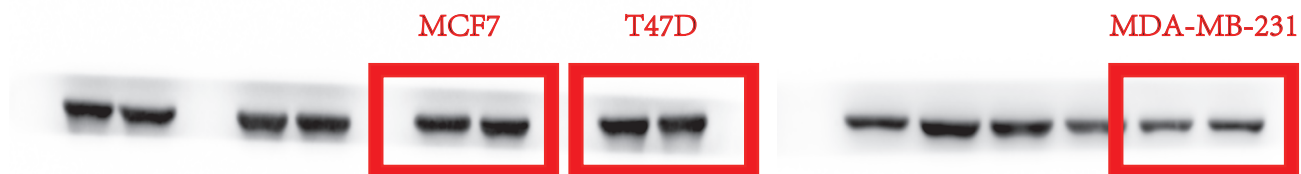

Figure 5 NUDT5

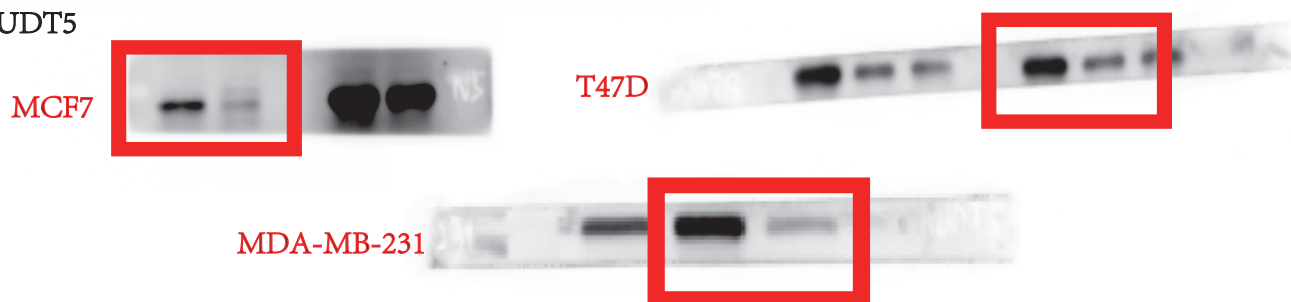

Figure 5 ERK

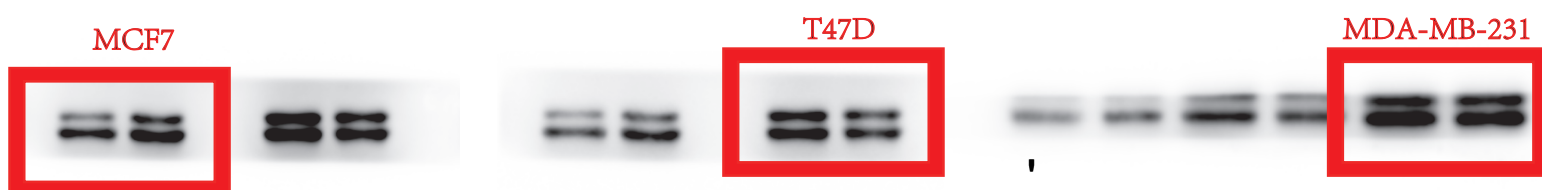

Figure 5 P-ERK

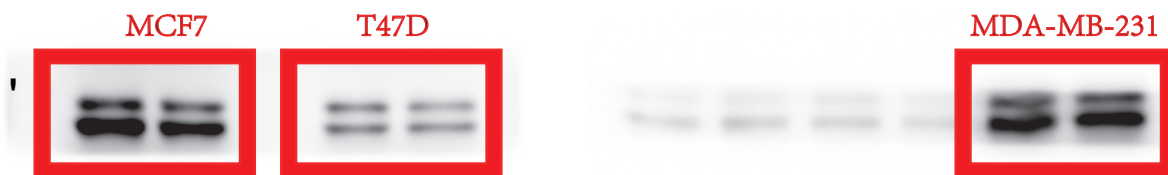

Figure 5 AKT

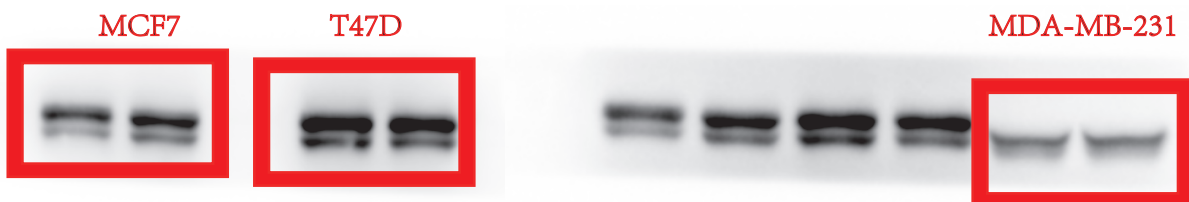

Figure 5 P-AKT

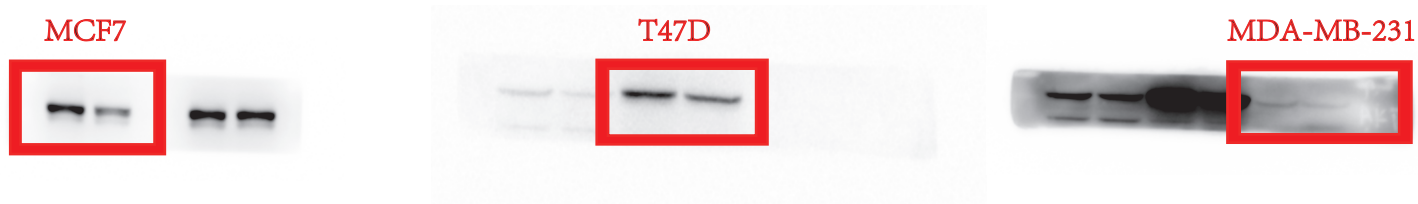

Figure 5 CYCLIND1

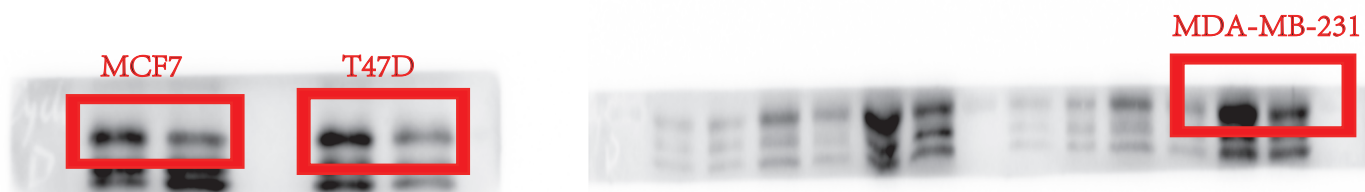

Figure 6  $\beta$ -actin

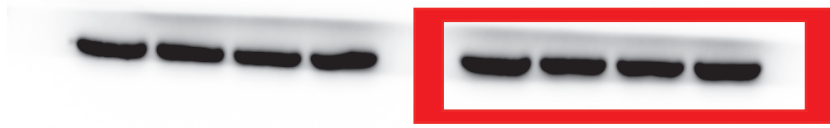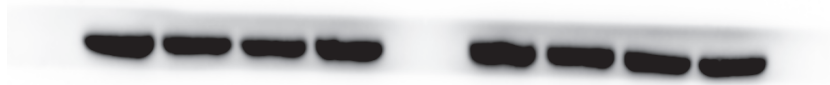

Figure 6 NUDT5

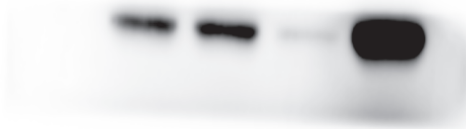

Figure 6 ERK

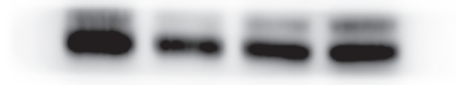

Figure 6 P-ERK

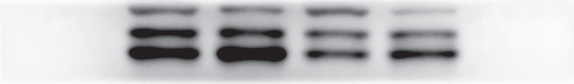

Figure 6 AKT

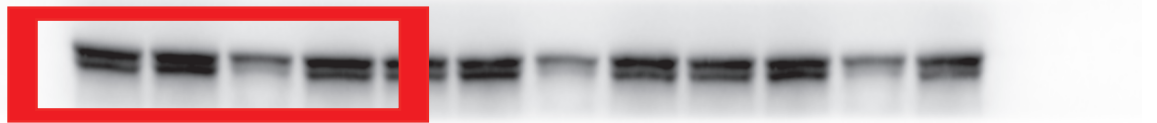

Figure 6 P-AKT

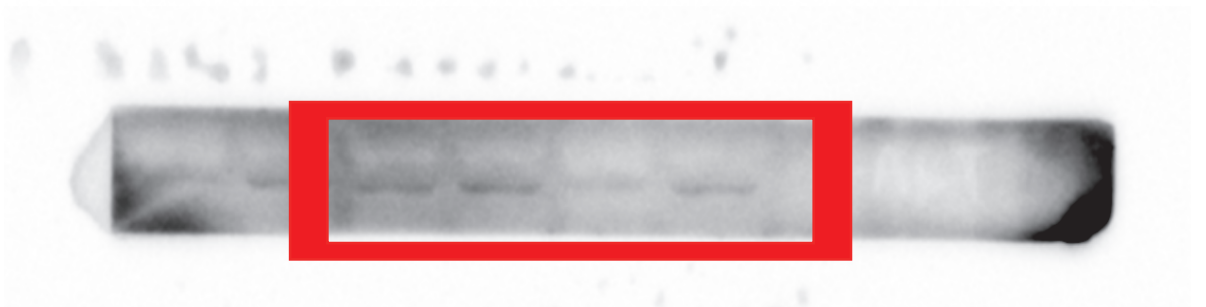

Figure 6 CYCLIND1

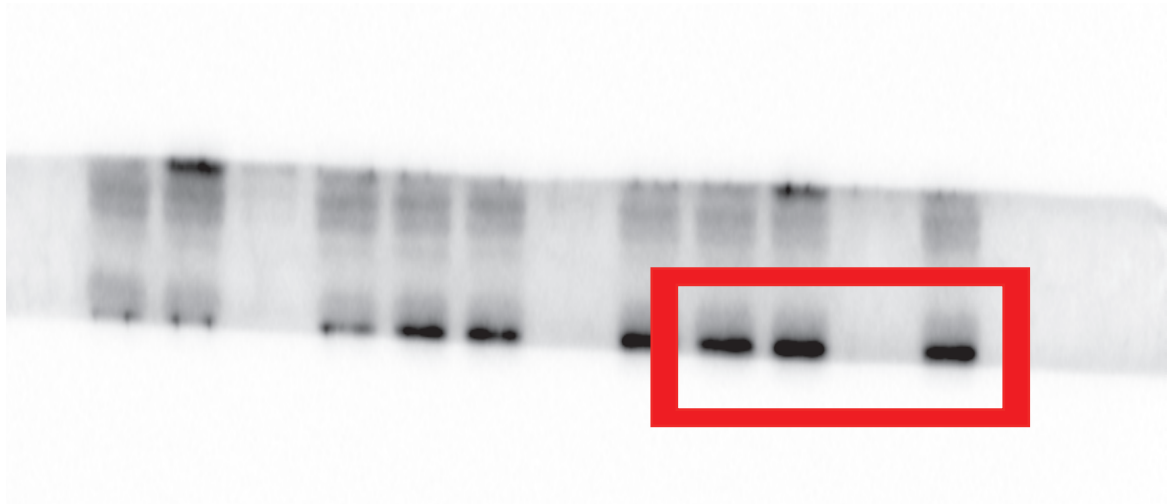

Supplement: pone.0245876.s002.pdf [file pone.0245876.s002.pdf]
